# Supplementary material
Source: Springer Nature journal article supplement (https://www.springermedizin.de/resource/supplementary/12957_2013_1626_MOESM1_ESM.pdf/9563060)
Supplement: MOESM1 [file 9563060]

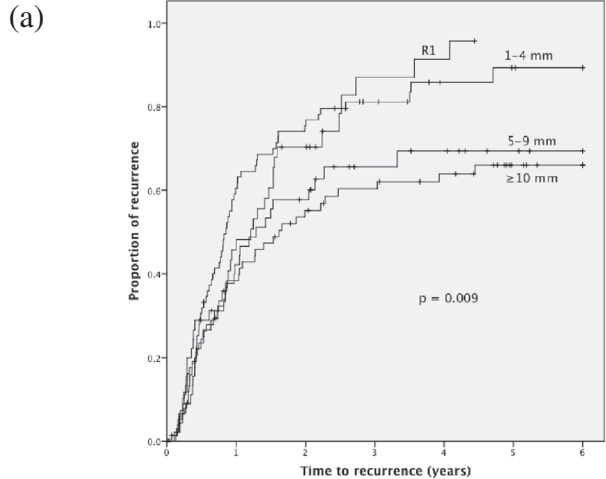

| Patients at risk | $\geq 10$ mm | 5-9 mm | 1-4 mm | R1 |
|------------------|--------------|--------|--------|----|
|                  | 71           | 46     | 76     | 45 |
|                  | 28           | 18     | 18     | 11 |
|                  | 19           | 7      | 4      | 2  |
|                  | 7            | 1      | 1      | 0  |

Note: Kaplan-Meier method and log-rank test:

1) R1 (A) vs. R0 (B-D):  $p = 0.127$ .

2)  $< 5$  mm (A and B) vs.  $\geq 5$  mm (C and D):  $p = 0.001$

3)  $< 10$  mm (A-C) vs.  $\geq 10$  mm (D):  $p = 0.020$

Date of recurrence was not retrieved in  $n = 4$  patients.

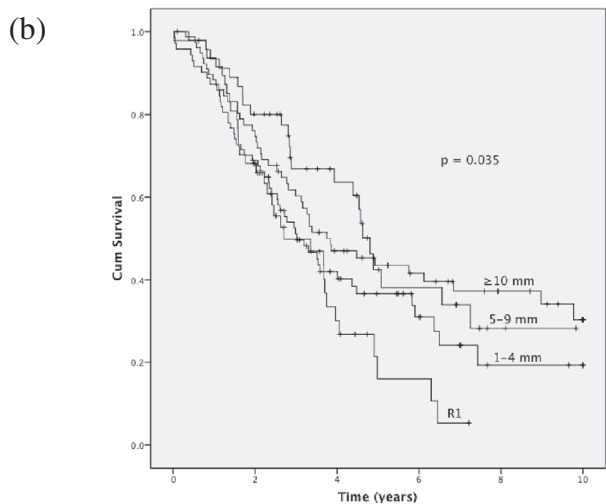

| Patients at risk | $\geq 10$ mm | 5-9 mm | 1-4 mm | R1 |
|------------------|--------------|--------|--------|----|
|                  | 71           | 46     | 77     | 48 |
|                  | 53           | 35     | 52     | 30 |
|                  | 30           | 20     | 25     | 9  |
|                  | 21           | 11     | 10     | 3  |
|                  | 13           | 2      | 3      | 0  |
|                  | 7            | 0      | 2      | 0  |

Note: Kaplan-Meier method and log-rank test:

1) R1 (A) vs. R0 (B-D):  $p = 0.011$

2)  $< 5$  mm (A and B) vs.  $\geq 5$  mm (C and D):  $p = 0.008$

3)  $< 10$  mm (A-C) vs.  $\geq 10$  mm (D):  $p = 0.239$
